# Supplementary material for: CADD-Splice—improving genome-wide variant effect prediction using deep learning-derived splice scores
Source: PubMed Central journal article supplement (PMC7901104; doi:10.1186/s13073-021-00835-9), 2021-02-22
Supplement: 13073_2021_835_MOESM1_ESM.pdf [file 13073_2021_835_MOESM1_ESM.pdf]

# CADD-Splice – improving genome-wide variant effect prediction using deep learning-derived splice scores

Philipp Rentzsch, Max Schubach, Jay Shendure, Martin Kircher

## Additional File 1: Supplementary Materials

### Supplemental Figures

**Fig S1: Performance of additional scores on the MFASS data set.** Precision-Recall (PR) curves of percent spliced-in (psi), pext and other scores for (A) all, (B) exonic, or (C) intronic MFASS variants. psi scores are superior to the potential genome wide replacement pext on exonic MFASS variants. For exonic variants, the hexamer score HAL is a very good splicing predictor. The HALpsi model takes psi into account and performs better than other scores. The combined SpliceAI and MMSplice score (MMAI, see also Fig. 2) can be linearly combined with psi (MMAIpsi) and outperforms HALpsi. On intronic variants (C) where pext and HAL are not defined, the auPRC of psi is smaller but also significantly different from random.

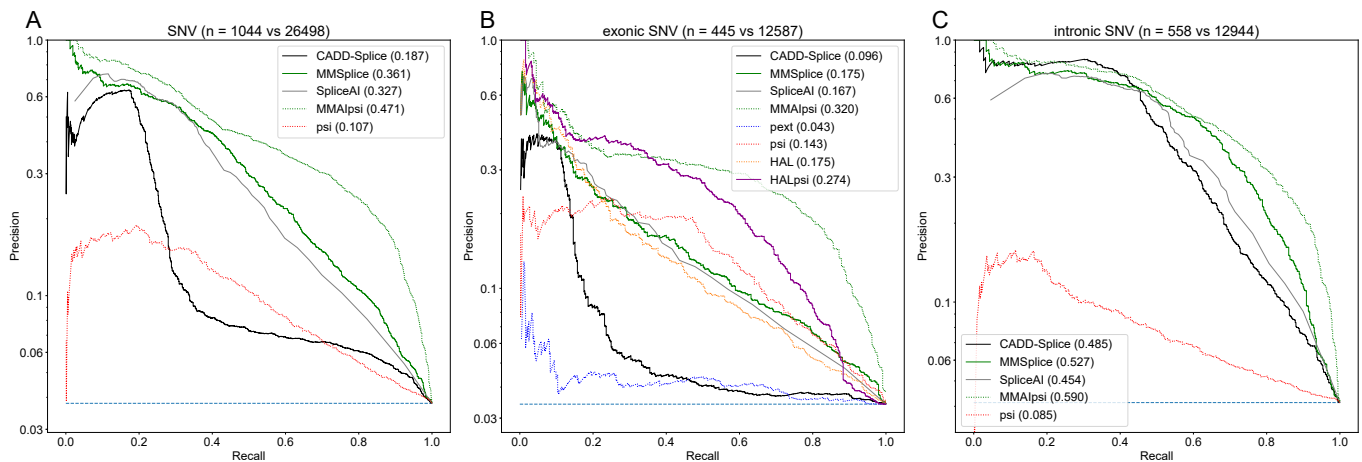

**Fig S2: Using the MFASS data set with different  $\Delta\psi$  thresholds.** The distinction of MFASS variants in splice disrupting and not-disrupting is made entirely based on the "change in psi" ( $\Delta\psi$ ) values. The threshold of 0.5 proposed in the MFASS publication is a compromise between high effect size and a sufficiently large number of splicing disruption variants (sdv). Higher thresholds (A:  $\Delta\psi > 0.7$ ) decrease, while lower thresholds (B:  $\Delta\psi > 0.3$ , C:  $\Delta\psi > 1$ ) increase the number of sdv. While score performances change slightly depending on the threshold, the relative results are very similar. This is also true when excluding uncertain variants with  $\Delta\psi$  between 0.5 and 0.1 from analysis (D).

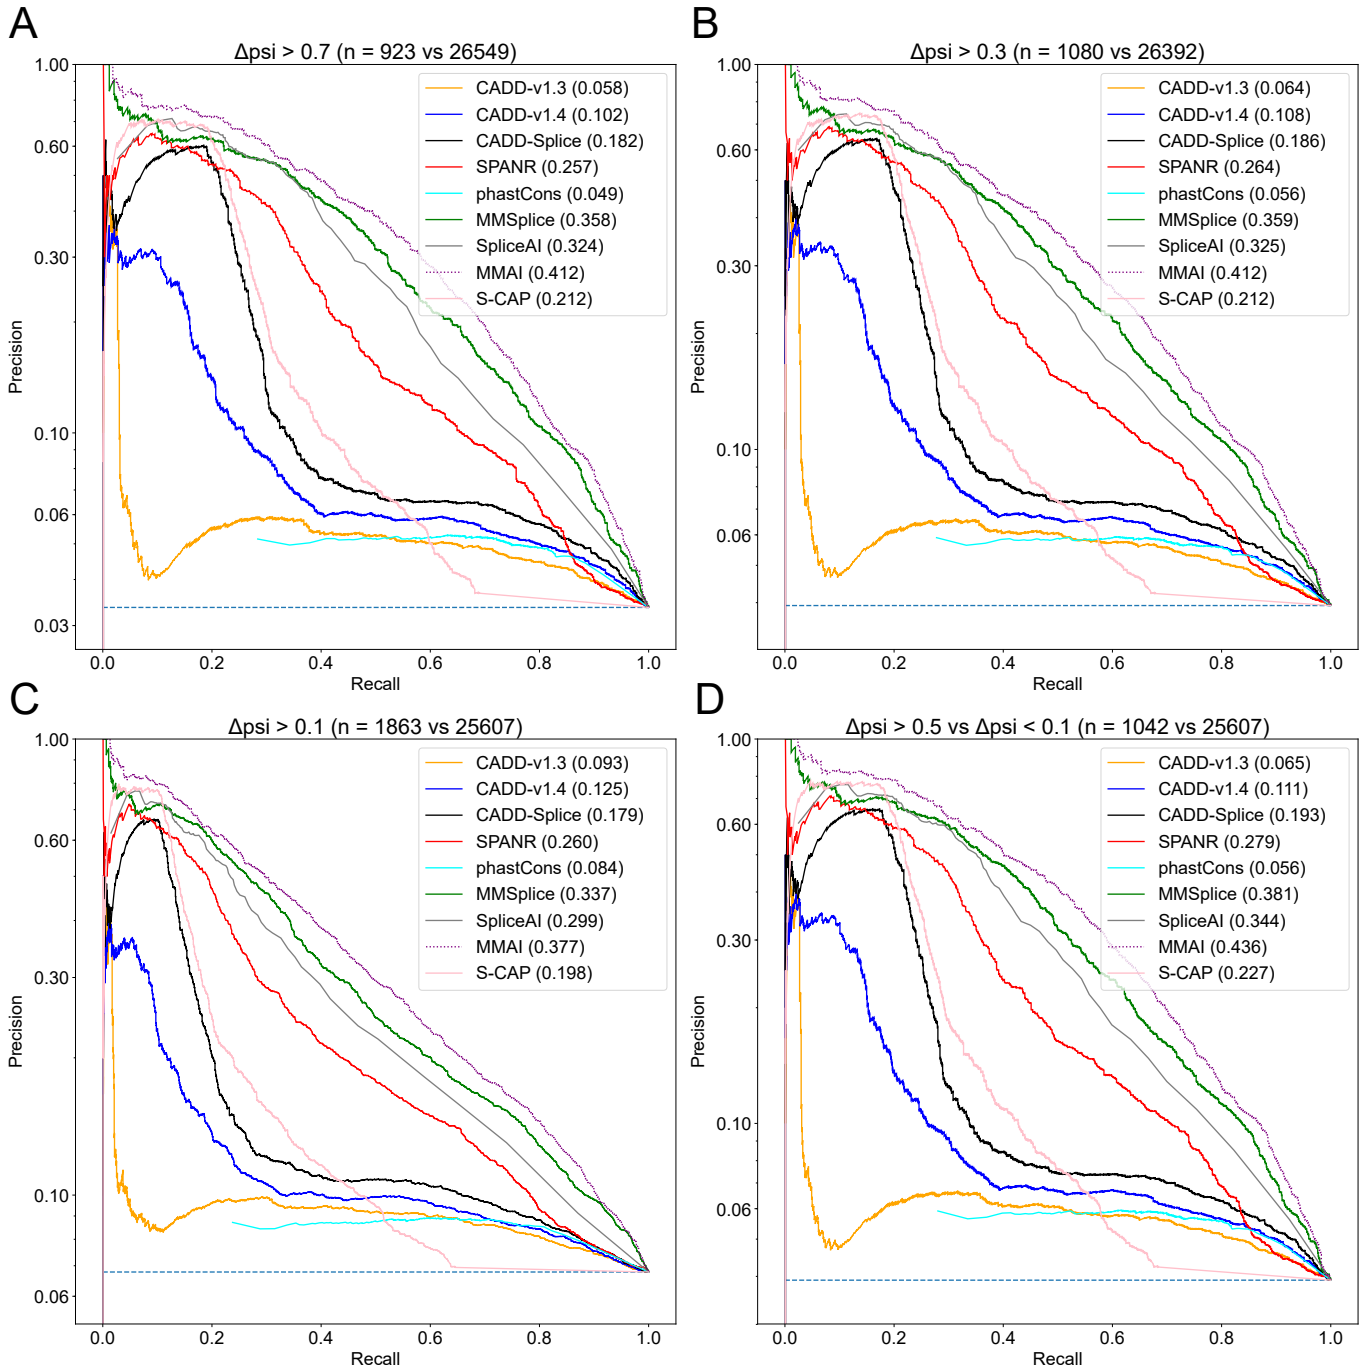

**Fig S3: CADD v1.4 benefited from dbscSNV.** Precision-Recall curves for different CADD versions, dbscSNV, MMSplice and SpliceAI. Panel (A) shows only the MFASS variants where the dbscSNV random forest score is defined. Panel (B) presents the remaining MFASS variants. While CADD v1.4 outperforms CADD v1.3 on variants with scores available from dbscSNV, the performance of both versions is very similar where dbscSNV is not defined.

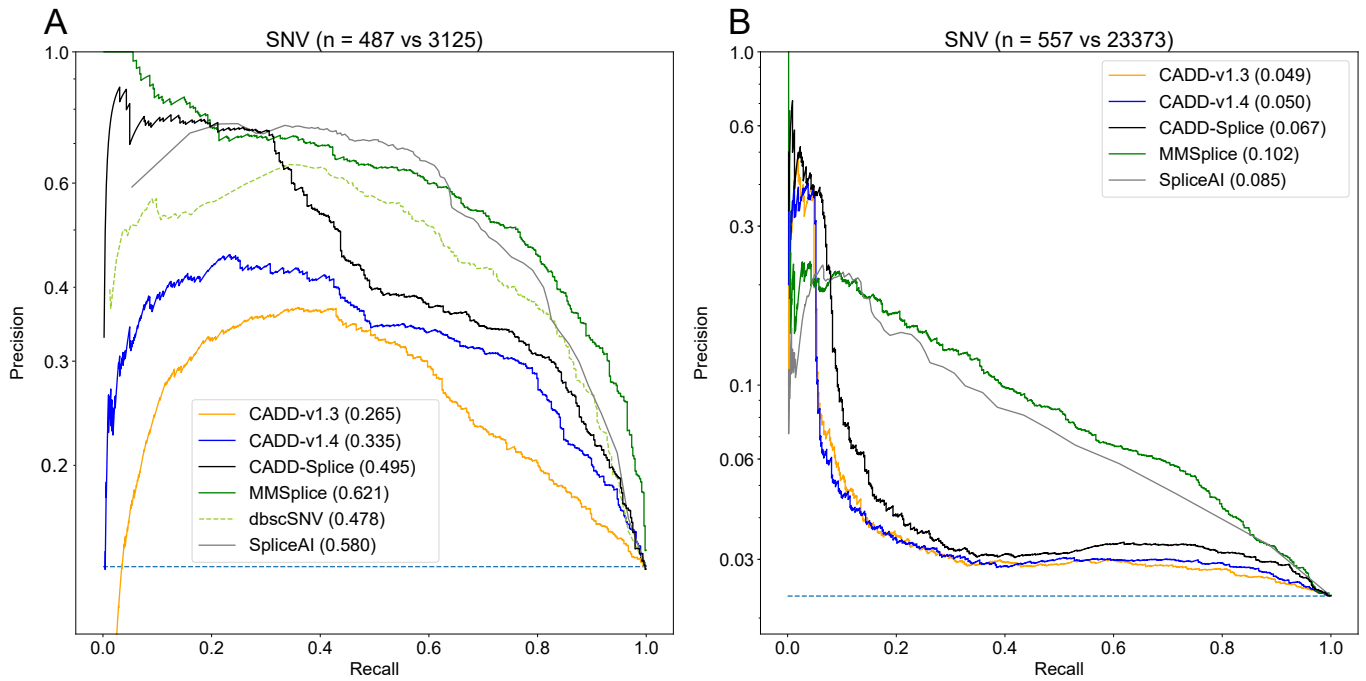

**Fig S4: Separation of SpliceAI submodel scores in CADD training data set.** Histograms of SpliceAI donor gain and acceptor loss submodel scores for 10 million SNV of the proxy-deleterious (simulated) and proxy-benign (human derived) category from the CADD training data set. Masked variants (loss variants that influence a known splice junction and gain variants outside of a known splice junction) are depleted in the simulated category for variants with high scores. Other variants (loss outside of known splice junction/gain at a known splice junction) are not depleted. Not all training set variants could be annotated by SpliceAI. Number of variants per plot is given as n = number simulated / number of human derived variants.

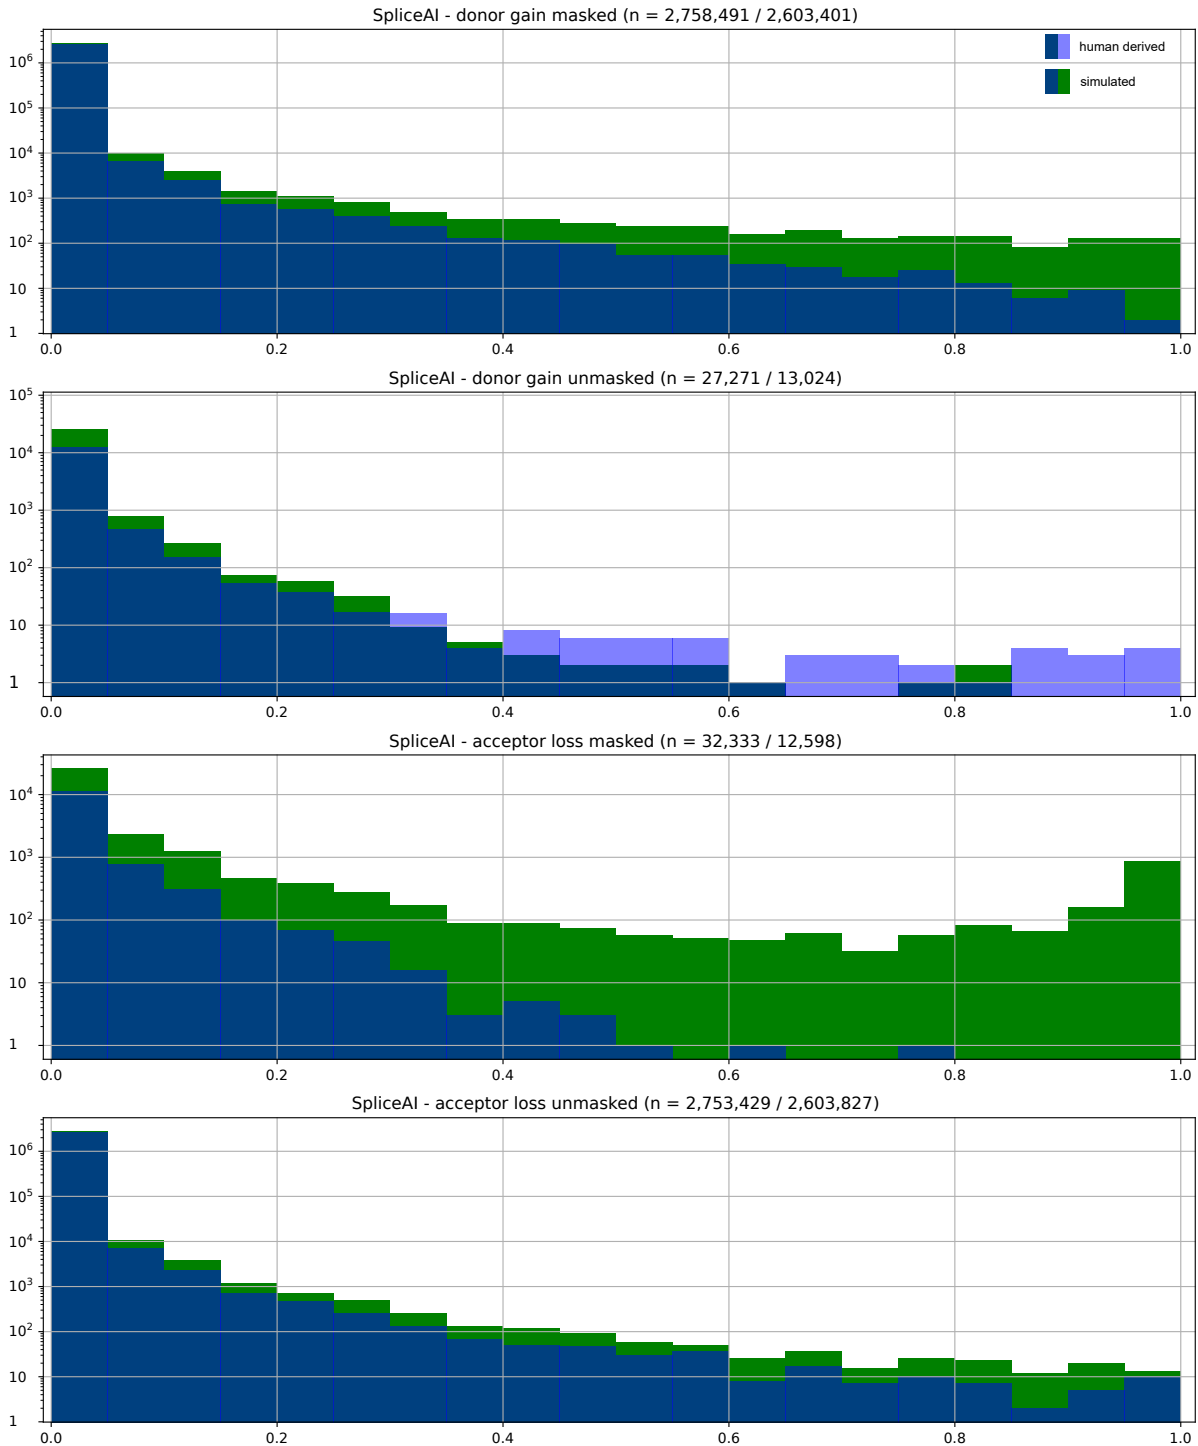

**Fig S5: MMSplice submodel scores in CADD training data set.** Histograms of MMSplice scores for SNV of the proxy-deleterious (simulated) and proxy-benign (human derived) category from the CADD training data set. Number of variants per plot is given as  $n = \text{number of simulated variants} / \text{number of human derived variants}$ . MMSplice submodel scores are the result of subtracting the prediction for reference allele from that of the sequence of the alternative allele. Functional changes are expected to result in different model predictions between the alleles and thus give a positive or negative score. For negative scores, a depletion of human derived variants is observed. This enrichment gets more pronounced for increasingly negative scores. For positive scores, a depletion of simulated variants is observed (most prominently for acceptor and donor model). This is in violation to the expectation of functional variants being depleted in the human derived relative to the simulated set in CADD training. It most likely results from the inversion of reference/alternative alleles necessary for scoring human derived variants, while relying on transcript models of the human reference.

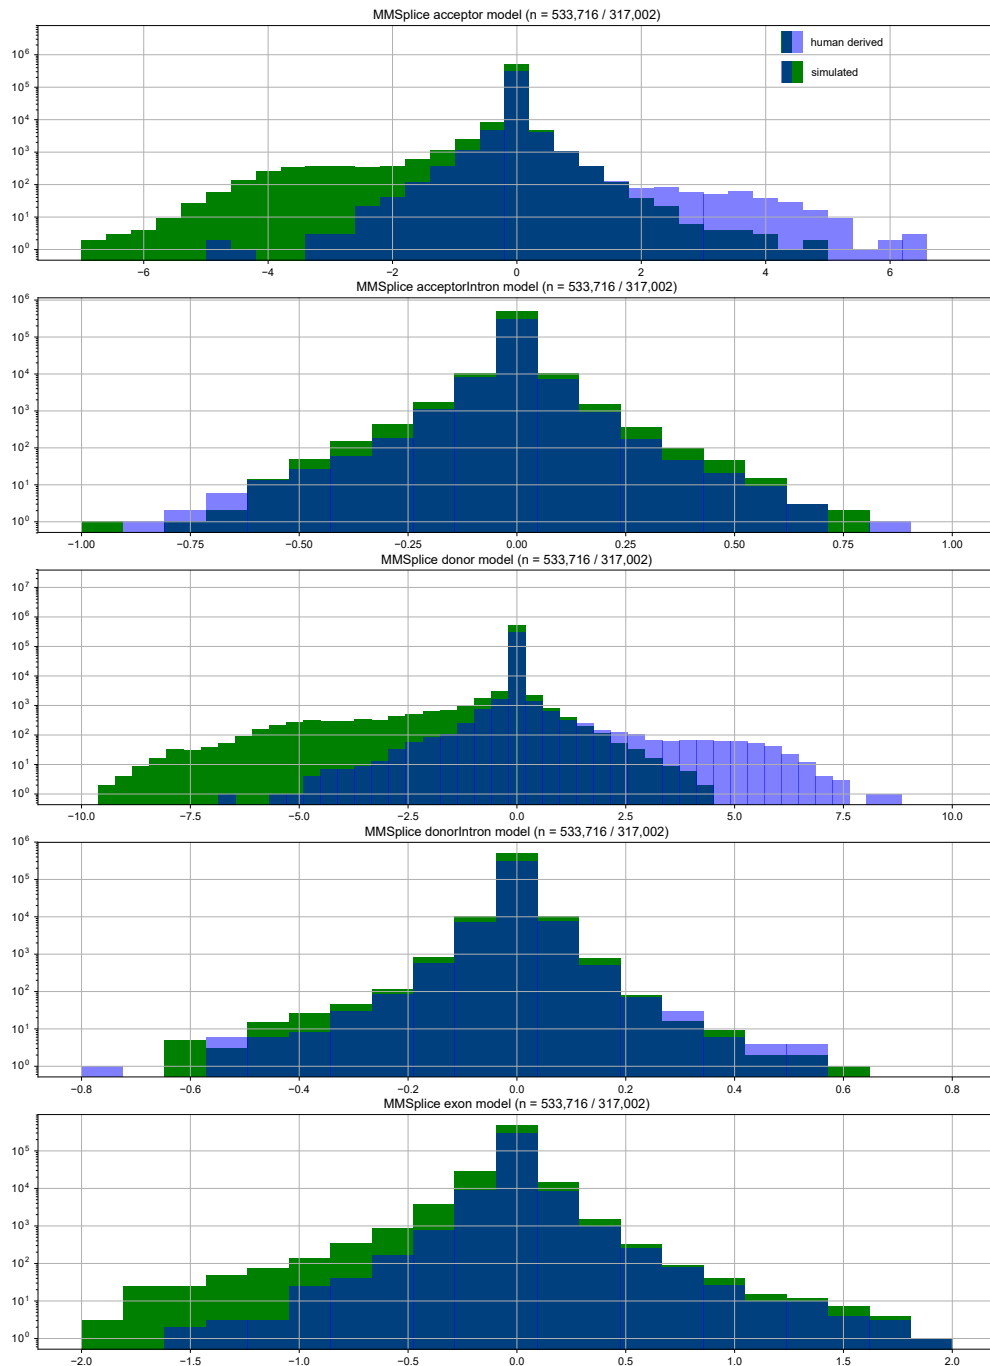

**Fig S6: ClinVar pathogenic vs. common gnomAD variants for additional variant effect classes.** CADD-Splice modestly outperforms previous versions of CADD in distinguishing between pathogenic variants from ClinVar and common population variants (MAF > 0.05) from gnomAD in terms of auROC. All three tested CADD versions are better than specialized scores when tested on all SNV (A) or missense SNV (B). For synonymous SNV (C), the CADD-Splice model performs similar to SpliceAI and better than previous versions. Only very few common variants are found at canonical splice sites (D). On this limited variant set, specialized splice scores perform worse than for other splicing related variant types.

### ClinVar pathogenic vs common gnomAD

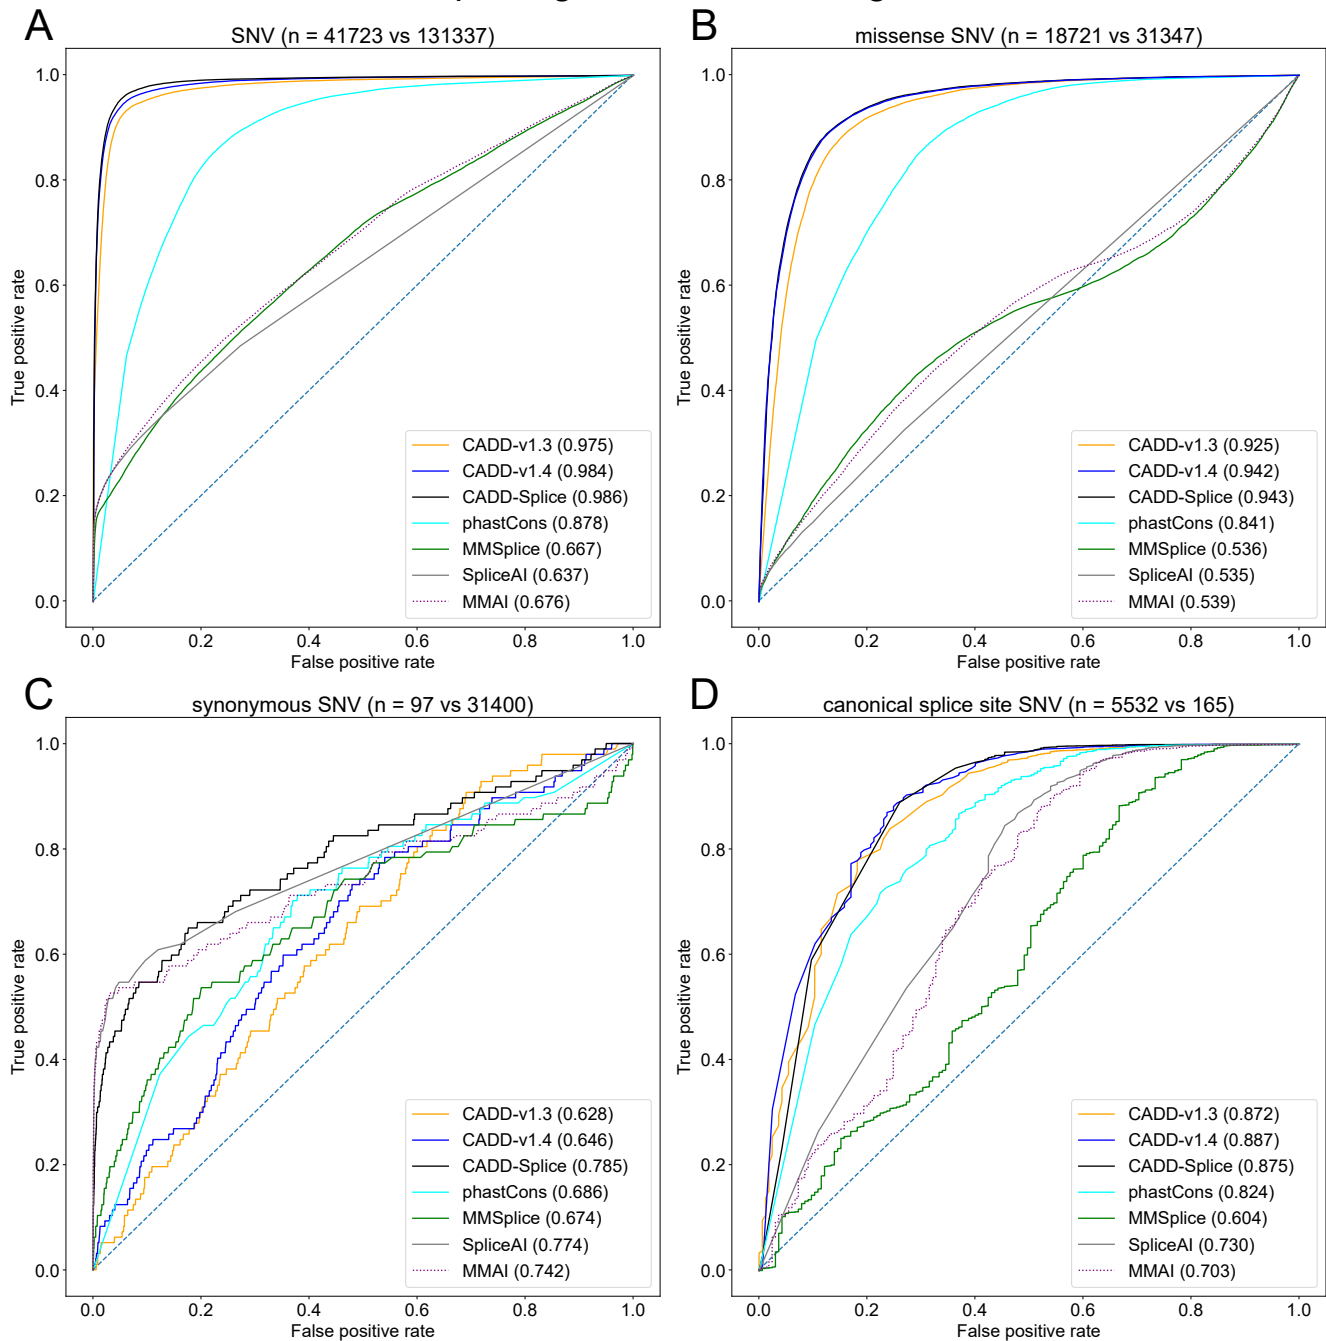

**Fig S7: Depletion and enrichment of non-splicing gnomAD variants.** Depletion and enrichment of variants grouped by frequency and CADD score bins, with CADD-Splice outperforming previous versions. At high CADD scores frequent (mean allele frequency MAF > 0.001) and rare (allele count > 1) variants are depleted and singletons (observed once in gnomAD) enriched. The most recent versions of CADD (v1.4 and CADD-Splice) enrich singleton variants and deplete frequent variants at higher relative scores with very similar ratios for synonymous (left), missense (middle) and intronic variants (right).

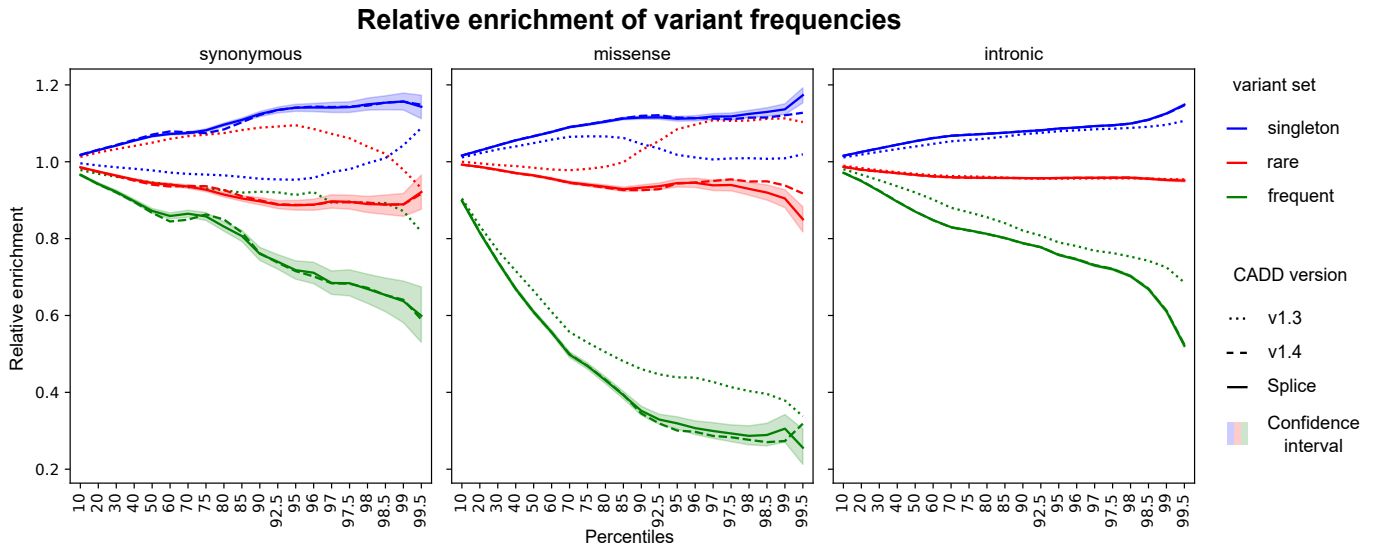

**Fig S8: ClinVar likely-pathogenic vs. rare gnomAD variants.** While ClinVar pathogenic variants are used in training of splicing classifiers, variants assigned the clinical significance "likely-pathogenic" may be used as a non-overlapping validation set. Similarly, common variants (MAF > 0.05) are often used as benign sets, but non-singleton rare variants (MAF < 0.05, allele count > 1) are also under purifying selection. Therefore, we use the comparison ClinVar likely-pathogenic vs. rare gnomAD variants as a replacement and additional validation set. All three tested CADD versions are better than specialized scores when tested on all SNV (A), intronic (C) or missense SNV (D). For splice site variants (B), the splice scores SpliceAI and MMSplice perform as good or better than previous versions of CADD, with CADD-Splice performing better than all. For synonymous SNV (E), the CADD-Splice model performs similar to SpliceAI and better than previous versions. On canonical splice site variants (F), specialized splice scores perform worse than for other splicing related variant types and do not improve performance of CADD-Splice in comparison to CADD GRCh37-v1.4.

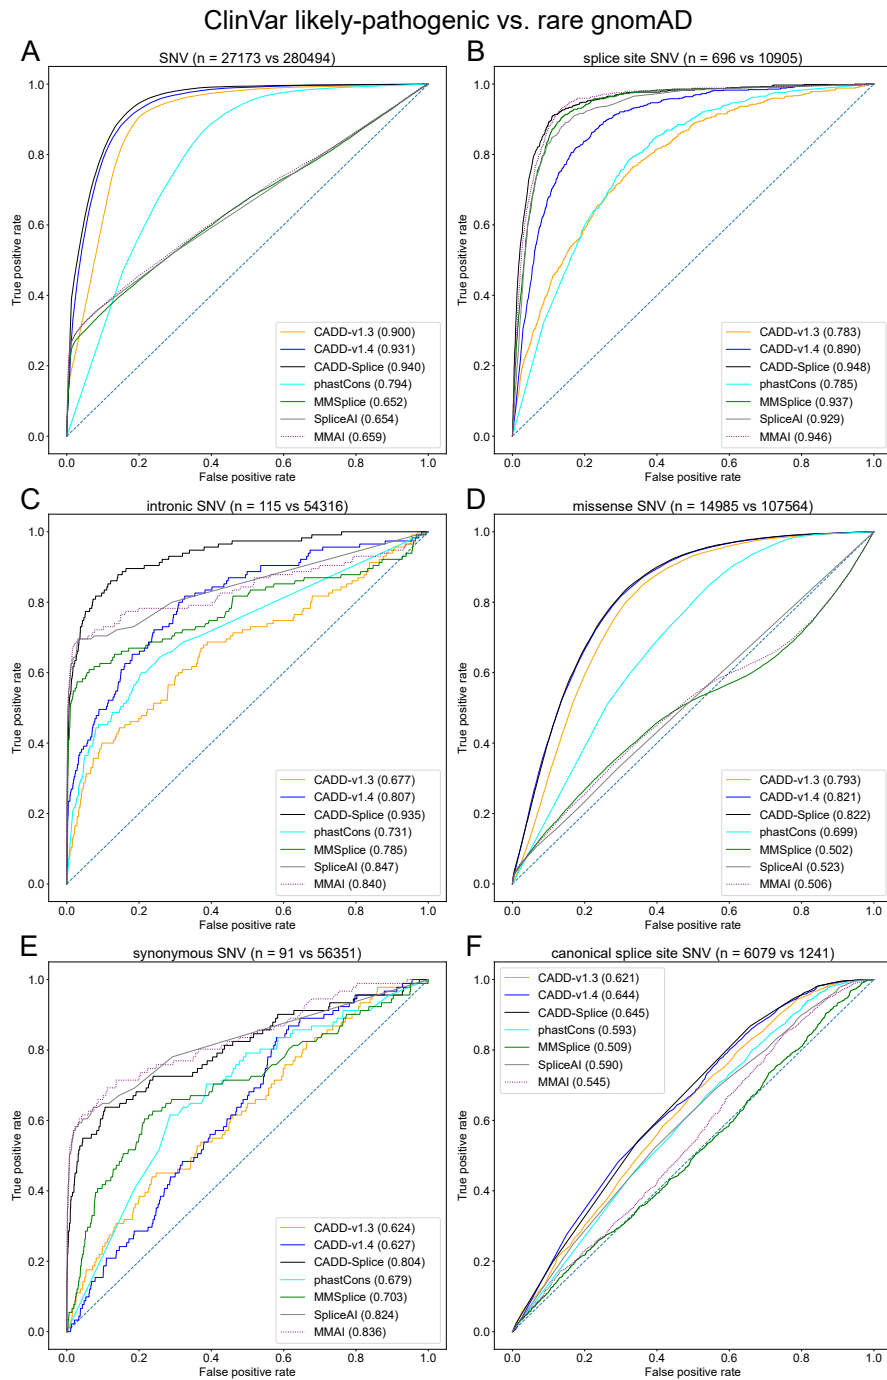



**Fig S9: Comparing additional scores for ClinVar likely-pathogenic vs. rare gnomAD variants.** Scores of additional tools are compared on ClinVar likely-pathogenic SNV and rare population variants (MAF<0.05, allele count > 1) from gnomAD. As not all tools score all variants, either the number of variants compared depends on the chosen set of scores or performance of tools is impacted by how missing scores are imputed. Here, S-CAP is compared by first selecting only SNV that can be scored (A-D). Secondly, SNV with missing S-CAP scores are imputed as benign (score of 0) in panels (E-H). While coverage of canonical splice site SNV (B & F) is very high and of similar frequency in likely-pathogenic and proxy neutral variants, other categories such as intronic are missing S-CAP scores for many variants. Across panels B-D and F-H, S-CAP misses 5,980 out of 66,608 (9%) variants.

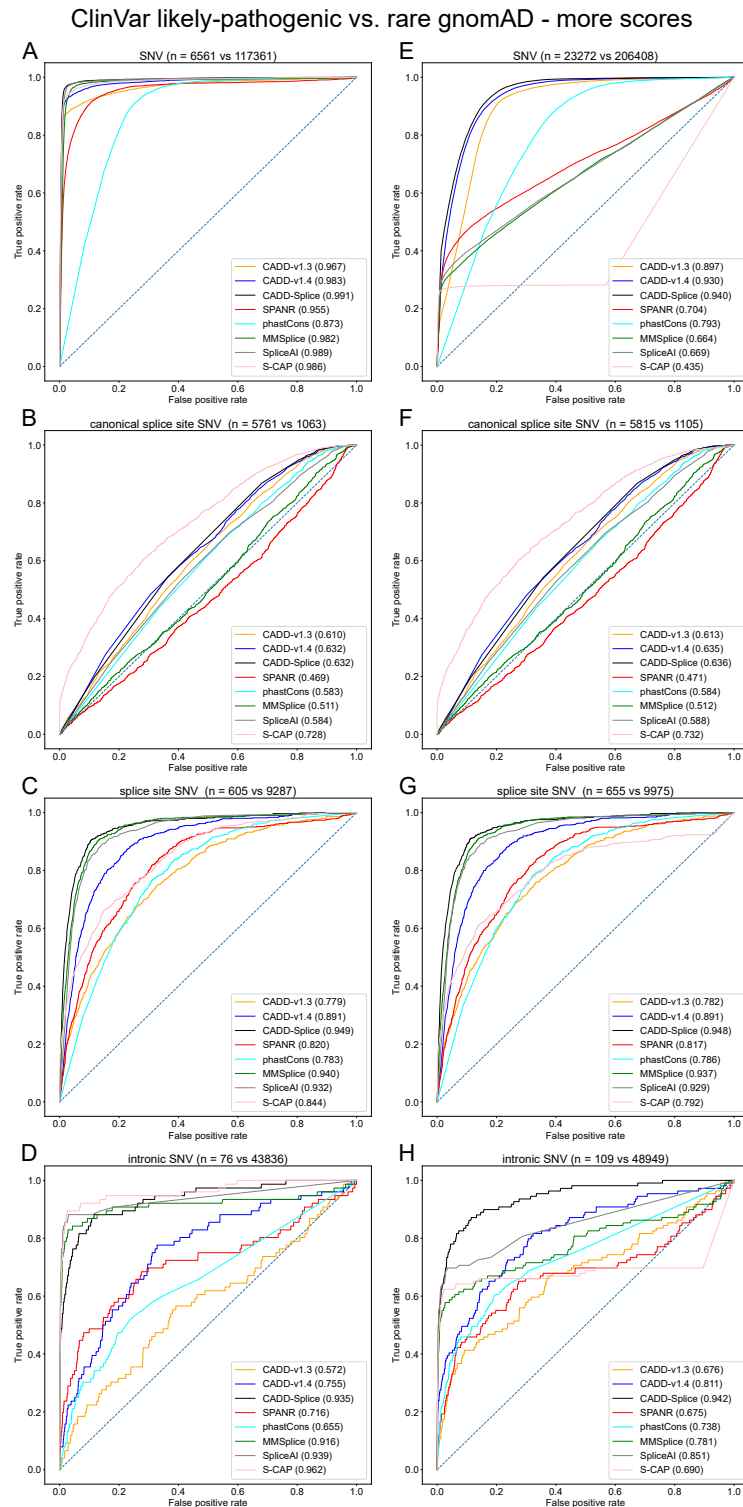

**Fig S10: CADD GRCh38 - ClinVar pathogenic vs. common gnomAD.** Using the same parameters as for CADD-Splice, we trained a CADD model for GRCh38 that includes MMSplice and SpliceAI. As for GRCh37, performance on all SNV classes (A) and splice site variants (B) for separating pathogenic variants from ClinVar from common variants in gnomAD (MAF > 0.05) improves with v1.6 over the previous release v1.5. In order to compare performance across genome builds, variants were lifted from GRCh37 to GRCh38 post scoring.

### CADD on GRCh38 - ClinVar pathogenic vs frequent gnomAD

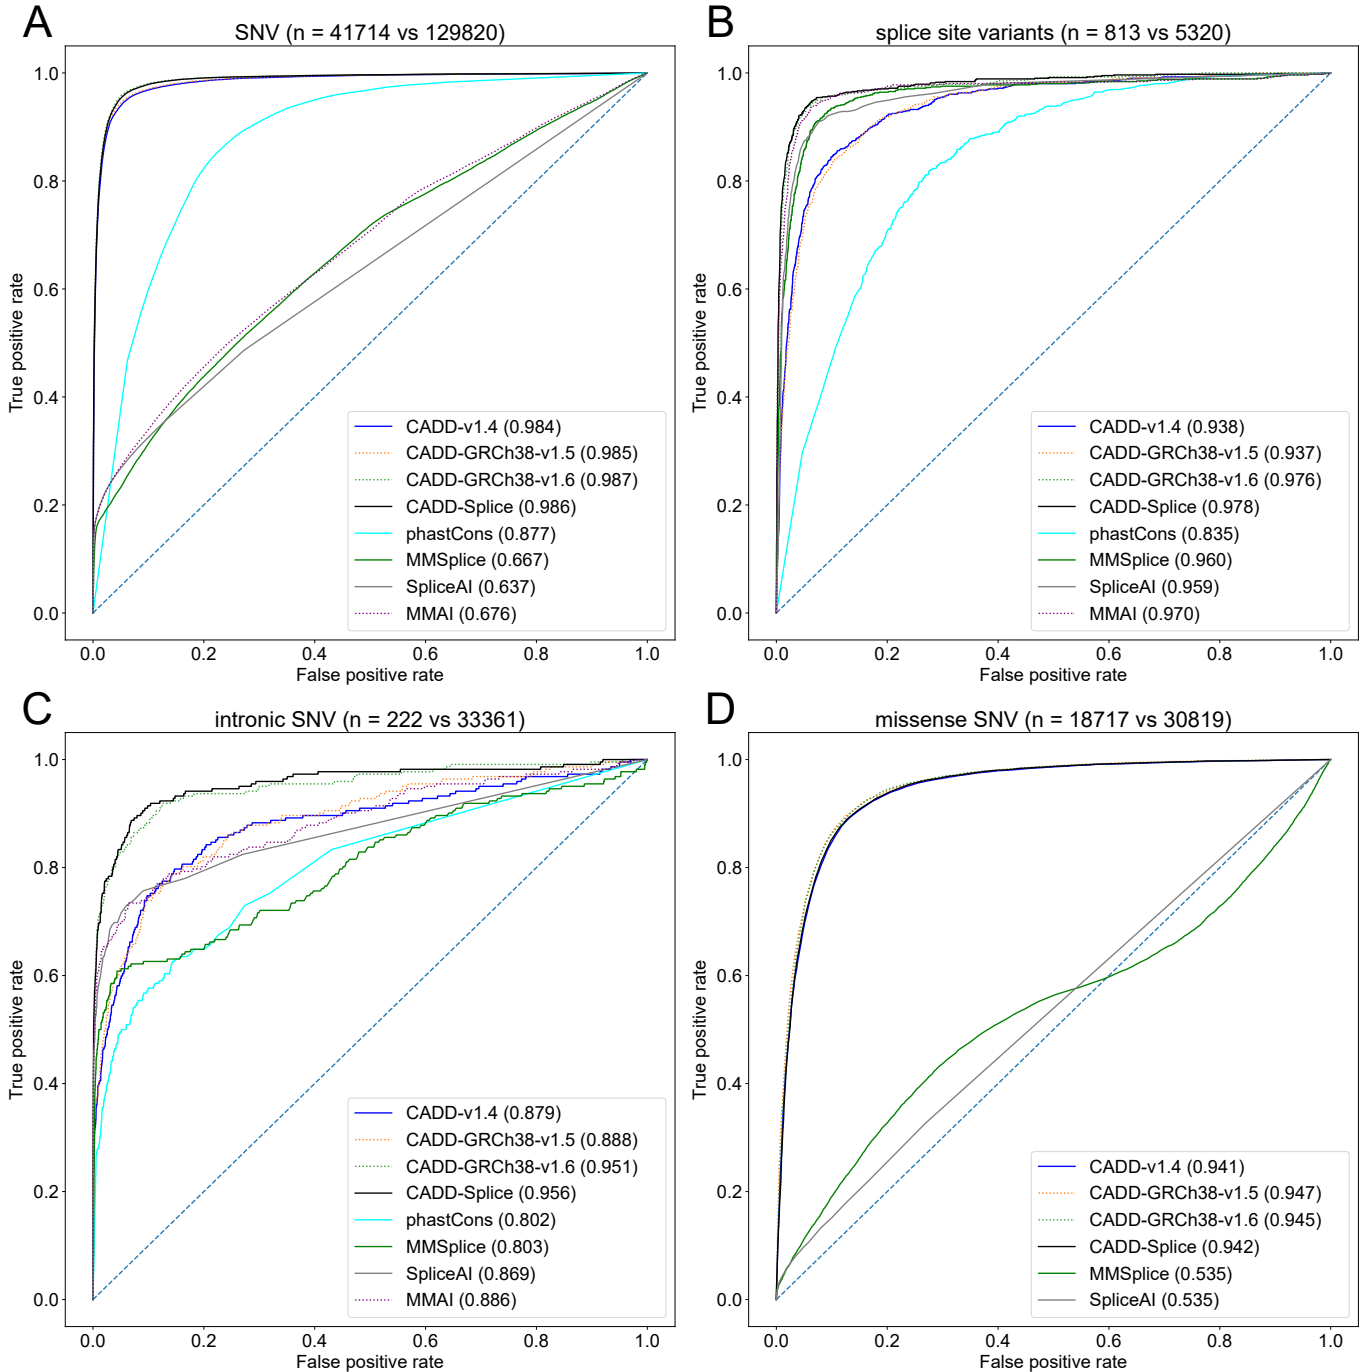

## Supplemental Tables

**Table S1: CADD-Splice (CADD GRCh37-v1.6) annotations.** Columns in CADD v1.6 (GRCh37 model) output files including underlying annotations. Name fields in parentheses describe annotations that are not used for calculating the CADD score and only serve for the user to interpret the prediction results.

|    | Name            | Type   | Description                                                                                                                     |
|----|-----------------|--------|---------------------------------------------------------------------------------------------------------------------------------|
| 1  | (Chrom)         | string | Chromosome                                                                                                                      |
| 2  | (Pos)           | int    | Position (1-based)                                                                                                              |
| 3  | Ref             | factor | Reference allele (default: N)                                                                                                   |
| 4  | Alt             | factor | Observed allele (default: N)                                                                                                    |
| 5  | Type            | factor | Event type (SNV, DEL, INS)                                                                                                      |
| 6  | Length          | int    | Number of inserted/deleted bases                                                                                                |
| 7  | (Annotype)      | factor | CodingTranscript, Intergenic, MotifFeature, NonCodingTranscript, RegulatoryFeature, Transcript                                  |
| 8  | Consequence     | factor | VEP consequence, priority selected by potential impact (default: INTERGENIC)                                                    |
| 9  | (ConsScore)     | int    | Custom deleterious score assigned to Consequence                                                                                |
| 10 | (ConsDetail)    | string | Trimmed VEP consequence prior to simplification                                                                                 |
| 11 | GC              | float  | Percent GC in a window of +/- 75bp (default: 0.42)                                                                              |
| 12 | CpG             | float  | Percent CpG in a window of +/- 75bp (default: 0.02)                                                                             |
| 13 | MotifECount     | int    | Total number of overlapping motifs (default: 0)                                                                                 |
| 14 | (MotifENAME)    | string | Name of sequence motif the position overlaps                                                                                    |
| 15 | MotifEHIPos     | bool   | Is the position considered highly informative for an overlapping motif by VEP (default: 0)                                      |
| 16 | MotifEScoreChng | float  | VEP score change for the overlapping motif site (default: 0)                                                                    |
| 17 | oAA             | factor | Reference amino acid (default: unknown)                                                                                         |
| 18 | nAA             | factor | Amino acid of observed variant (default: unknown)                                                                               |
| 19 | (GeneID)        | string | ENSEMBL GeneID                                                                                                                  |
| 20 | (FeatureID)     | string | ENSEMBL feature ID (Transcript ID or regulatory feature ID)                                                                     |
| 21 | (GeneName)      | string | GeneName provided in ENSEMBL annotation                                                                                         |
| 22 | (CCDS)          | string | Consensus Coding Sequence ID                                                                                                    |
| 23 | (Intron)        | string | Intron number/Total number of exons                                                                                             |
| 24 | (Exon)          | string | Exon number/Total number of exons                                                                                               |
| 25 | cDNApos         | float  | Base position from transcription start (default: 0*)                                                                            |
| 26 | relcDNApos      | float  | Relative position in transcript (default: 0)                                                                                    |
| 27 | CDSpos          | float  | Base position from coding start (default: 0*)                                                                                   |
| 28 | relCDSpos       | float  | Relative position in coding sequence (default: 0)                                                                               |
| 29 | protPos         | float  | Amino acid position from coding start (default: 0*)                                                                             |
| 30 | relprotPos      | float  | Relative position in protein codon (default: 0)                                                                                 |
| 31 | Domain          | factor | Domain annotation inferred from VEP annotation (ncoils, sigp, lcompl, hmmpanther, ndomain = "other named domain") (default: UD) |
| 32 | Dst2Splice      | float  | Distance to splice site in 20bp; positive: exonic, negative: intronic (default: 0)                                              |
| 33 | Dst2SplType     | factor | Closest splice site is ACCEPTOR or DONOR (default: unknown)                                                                     |
| 34 | MinDistTSS      | float  | Distance to closest Transcribed Sequence Start (TSS) (default: 5.5)                                                             |
| 35 | MinDistTSE      | float  | Distance to closest Transcribed Sequence End (TSE) (default: 5.5)                                                               |
| 36 | SIFTcat         | factor | SIFT category of change (default: UD)                                                                                           |

|    |                |        |                                                                                                                         |
|----|----------------|--------|-------------------------------------------------------------------------------------------------------------------------|
| 37 | SIFTval        | float  | SIFT score (default: 0*)                                                                                                |
| 38 | PolyPhenCat    | factor | PolyPhen category of change (default: UD)                                                                               |
| 39 | PolyPhenVal    | float  | PolyPhen score (default: 0*)                                                                                            |
| 40 | priPhCons      | float  | Primate PhastCons conservation score (excl. human) (default: 0.115)                                                     |
| 41 | mamPhCons      | float  | Mammalian PhastCons conservation score (excl. human) (default: 0.079)                                                   |
| 42 | verPhCons      | float  | Vertebrate PhastCons conservation score (excl. human) (default: 0.094)                                                  |
| 43 | priPhyloP      | float  | Primate PhyloP score (excl. human) (default: -0.033)                                                                    |
| 44 | mamPhyloP      | float  | Mammalian PhyloP score (excl. human) (default: -0.038)                                                                  |
| 45 | verPhyloP      | float  | Vertebrate PhyloP score (excl. human) (default: 0.017)                                                                  |
| 46 | bStatistic     | int    | Background selection score (default: 800)                                                                               |
| 47 | targetScan     | int    | targetscan (default: 0*)                                                                                                |
| 48 | mirSVR-Score   | float  | mirSVR-Score (default: 0*)                                                                                              |
| 49 | mirSVR-E       | float  | mirSVR-E (default: 0)                                                                                                   |
| 50 | mirSVR-Aln     | int    | mirSVR-Aln (default: 0)                                                                                                 |
| 51 | cHmmTssA       | float  | Proportion of 127 cell types in cHmmTssA state (default: 0.0667*)                                                       |
| 52 | cHmmTssAFlnk   | float  | Proportion of 127 cell types in cHmmTssAFlnk state (default: 0.0667)                                                    |
| 53 | cHmmTxFlnk     | float  | Proportion of 127 cell types in cHmmTxFlnk state (default: 0.0667)                                                      |
| 54 | cHmmTx         | float  | Proportion of 127 cell types in cHmmTx state (default: 0.0667)                                                          |
| 55 | cHmmTxWk       | float  | Proportion of 127 cell types in cHmmTxWk state (default: 0.0667)                                                        |
| 56 | cHmmEnhG       | float  | Proportion of 127 cell types in cHmmEnhG state (default: 0.0667)                                                        |
| 57 | cHmmEnh        | float  | Proportion of 127 cell types in cHmmEnh state (default: 0.0667)                                                         |
| 58 | cHmmZnfRpts    | float  | Proportion of 127 cell types in cHmmZnfRpts state (default: 0.0667)                                                     |
| 59 | cHmmHet        | float  | Proportion of 127 cell types in cHmmHet state (default: 0.0667)                                                         |
| 60 | cHmmTssBiv     | float  | Proportion of 127 cell types in cHmmTssBiv state (default: 0.0667)                                                      |
| 61 | cHmmBivFlnk    | float  | Proportion of 127 cell types in cHmmBivFlnk state (default: 0.0667)                                                     |
| 62 | cHmmEnhBiv     | float  | Proportion of 127 cell types in cHmmEnhBiv state (default: 0.0667)                                                      |
| 63 | cHmmReprPC     | float  | Proportion of 127 cell types in cHmmReprPC state (default: 0.0667)                                                      |
| 64 | cHmmReprPCWk   | float  | Proportion of 127 cell types in cHmmReprPCWk state (default: 0.0667)                                                    |
| 65 | cHmmQuies      | float  | Proportion of 127 cell types in cHmmQuies state (default: 0.0667)                                                       |
| 66 | GerpRS         | float  | Gerp element score (default: 0)                                                                                         |
| 67 | GerpRSpval     | float  | Gerp element p-Value (default: 0)                                                                                       |
| 68 | GerpN          | float  | Neutral evolution score defined by GERP++ (default: 1.91)                                                               |
| 69 | GerpS          | float  | Rejected Substitution score defined by GERP++ (default: -0.2)                                                           |
| 70 | TFBS           | float  | Number of different overlapping ChIP transcription factor binding sites (default: 0)                                    |
| 71 | TFBSPeaks      | float  | Number of overlapping ChIP transcription factor binding site peaks summed over different cell types/tissue (default: 0) |
| 72 | TFBSPeaksMax   | float  | Maximum value of overlapping ChIP transcription factor binding site peaks across cell types/tissue (default: 0)         |
| 73 | tOverlapMotifs | float  | Number of overlapping predicted TF motifs (default: 0)                                                                  |
| 74 | motifDist      | float  | Reference minus alternate allele difference in nucleotide frequency within an predicted overlapping motif (default: 0)  |
| 75 | Segway         | factor | Result of genomic segmentation algorithm (default: unknown)                                                             |
| 76 | Ench3K27Ac     | float  | Maximum ENCODE H3K27 acetylation level (default: 0)                                                                     |
| 77 | Ench3K4Me1     | float  | Maximum ENCODE H3K4 methylation level (default: 0)                                                                      |
| 78 | Ench3K4Me3     | float  | Maximum ENCODE H3K4 trimethylation level (default: 0)                                                                   |
| 79 | EncExp         | float  | Maximum ENCODE expression value (default: 0)                                                                            |

|     |                     |       |                                                                                                                  |
|-----|---------------------|-------|------------------------------------------------------------------------------------------------------------------|
| 80  | EncNucleo           | float | Maximum of ENCODE Nucleosome position track score (default: 0)                                                   |
| 81  | EncOCC              | int   | ENCODE open chromatin code (default: 5)                                                                          |
| 82  | EncOCCombPVal       | float | ENCODE combined p-Value (PHRED-scale) of Faire, Dnase, polII, CTCF, Myc evidence for open chromatin (default: 0) |
| 83  | EncOCDNasePVal      | float | p-Value (PHRED-scale) of Dnase evidence for open chromatin (default: 0)                                          |
| 84  | EncOCFairePVal      | float | p-Value (PHRED-scale) of Faire evidence for open chromatin (default: 0)                                          |
| 85  | EncOCpolIIPVal      | float | p-Value (PHRED-scale) of polII evidence for open chromatin (default: 0)                                          |
| 86  | EncOCctcfPVal       | float | p-Value (PHRED-scale) of CTCF evidence for open chromatin (default: 0)                                           |
| 87  | EncOCmycPVal        | float | p-Value (PHRED-scale) of Myc evidence for open chromatin (default: 0)                                            |
| 88  | EncOCDNaseSig       | float | Peak signal for Dnase evidence of open chromatin (default: 0)                                                    |
| 89  | EncOCFaireSig       | float | Peak signal for Faire evidence of open chromatin (default: 0)                                                    |
| 90  | EncOCpolIISig       | float | Peak signal for polII evidence of open chromatin (default: 0)                                                    |
| 91  | EncOCctcfSig        | float | Peak signal for CTCF evidence of open chromatin (default: 0)                                                     |
| 92  | EncOCmycSig         | float | Peak signal for Myc evidence of open chromatin (default: 0)                                                      |
| 93  | Grantham            | float | Grantham score: oAA,nAA (default: 0*)                                                                            |
| 94  | SpliceAI-acc-gain   | float | Masked SpliceAI acceptor gain score (default: 0*)                                                                |
| 95  | SpliceAI-acc-loss   | float | Masked SpliceAI acceptor loss score (default: 0)                                                                 |
| 96  | SpliceAI-don-gain   | float | Masked SpliceAI donor gain score (default: 0)                                                                    |
| 97  | SpliceAI-don-loss   | float | Masked SpliceAI donor loss score (default: 0)                                                                    |
| 98  | MMSp_acceptorIntron | float | MMSplice acceptor intron (intron 3') score (default: 0)                                                          |
| 99  | MMSp_acceptor       | float | MMSplice acceptor score (default: 0)                                                                             |
| 100 | MMSp_exon           | float | MMSplice exon score (default: 0)                                                                                 |
| 101 | MMSp_donor          | float | MMSplice donor score (default: 0)                                                                                |
| 102 | MMSp_donorIntron    | float | MMSplice donor intron (intron 5') score (default: 0)                                                             |
| 103 | Dist2Mutation       | float | Distance between the closest BRAVO SNV up and downstream (position itself excluded) (default: 0*)                |
| 104 | Freq100bp           | int   | Number of frequent (MAF > 0.05) gnomAD SNV in 100 bp window nearby (default: 0)                                  |
| 105 | Rare100bp           | int   | Number of rare (MAF < 0.05) gnomAD SNV in 100 bp window nearby (default: 0)                                      |
| 106 | Sngl100bp           | int   | Number of single occurrence gnomAD SNV in 100 bp window nearby (default: 0)                                      |
| 107 | Freq1000bp          | int   | Number of frequent (MAF > 0.05) gnomAD SNV in 1000 bp window nearby (default: 0)                                 |
| 108 | Rare1000bp          | int   | Number of rare (MAF < 0.05) gnomAD SNV in 1000 bp window nearby (default: 0)                                     |
| 109 | Sngl1000bp          | int   | Number of single occurrence gnomAD SNV in 1000 bp window nearby (default: 0)                                     |
| 110 | Freq10000bp         | int   | Number of frequent (MAF > 0.05) gnomAD SNV in 10000 bp window nearby (default: 0)                                |
| 111 | Rare10000bp         | int   | Number of rare (MAF < 0.05) gnomAD SNV in 10000 bp window nearby (default: 0)                                    |
| 112 | Sngl10000bp         | int   | Number of single occurrence gnomAD SNV in 10000 bp window nearby (default: 0)                                    |
| 113 | dbscSNV-ada_score   | float | Adaboost classifier score from dbscSNV (default: 0*)                                                             |
| 114 | dbscSNV-rf_score    | float | Random forest classifier score from dbscSNV (default: 0*)                                                        |
| 115 | (RawScore)          | float | Raw score from the model                                                                                         |

|     |         |       |                  |
|-----|---------|-------|------------------|
| 116 | (PHRED) | float | CADD PHRED Score |
|-----|---------|-------|------------------|

\* A Boolean indicator variable was created in order to handle undefined values. Note that often indicators represent more than one annotation. They are created for only (the first) one if the covered genomic regions are identical.

**Table S2: CADD GRCh38-v1.6 annotations.** Columns in CADD v1.6 (GRCh38 model) output files including underlying annotations. Name fields in parentheses describe annotations that are not used for calculating the CADD score and only serve for the user to interpret the prediction results.

|    | Name            | Type   | Description                                                                                                                     |
|----|-----------------|--------|---------------------------------------------------------------------------------------------------------------------------------|
| 1  | (Chrom)         | string | Chromosome                                                                                                                      |
| 2  | (Pos)           | int    | Position (1-based)                                                                                                              |
| 3  | Ref             | factor | Reference allele (default: N)                                                                                                   |
| 4  | Alt             | factor | Observed allele (default: N)                                                                                                    |
| 5  | Type            | factor | Event type (SNV, DEL, INS)                                                                                                      |
| 6  | Length          | int    | Number of inserted/deleted bases                                                                                                |
| 7  | (AnnoType)      | factor | CodingTranscript, Intergenic, MotifFeature, NonCodingTranscript, RegulatoryFeature, Transcript                                  |
| 8  | Consequence     | factor | VEP consequence, priority selected by potential impact (default: INTERGENIC)                                                    |
| 9  | (ConsScore)     | int    | Custom deleterious score assigned to Consequence                                                                                |
| 10 | (ConsDetail)    | string | Trimmed VEP consequence prior to simplification                                                                                 |
| 11 | GC              | float  | Percent GC in a window of +/- 75bp (default: 0.42)                                                                              |
| 12 | CpG             | float  | Percent CpG in a window of +/- 75bp (default: 0.02)                                                                             |
| 13 | motifECount     | int    | Total number of overlapping motifs (default: 0)                                                                                 |
| 14 | (motifEName)    | string | Name of sequence motif the position overlaps                                                                                    |
| 15 | motifEHIPos     | bool   | Is the position considered highly informative for an overlapping motif by VEP (default: 0)                                      |
| 16 | motifEScoreChng | float  | VEP score change for the overlapping motif site (default: 0)                                                                    |
| 17 | oAA             | factor | Reference amino acid (default: unknown)                                                                                         |
| 18 | nAA             | factor | Amino acid of observed variant (default: unknown)                                                                               |
| 19 | (GeneID)        | string | ENSEMBL GeneID                                                                                                                  |
| 20 | (FeatureID)     | string | ENSEMBL feature ID (Transcript ID or regulatory feature ID)                                                                     |
| 21 | (GeneName)      | string | GeneName provided in ENSEMBL annotation                                                                                         |
| 22 | (CCDS)          | string | Consensus Coding Sequence ID                                                                                                    |
| 23 | (Intron)        | string | Intron number/Total number of exons                                                                                             |
| 24 | (Exon)          | string | Exon number/Total number of exons                                                                                               |
| 25 | cDNApos         | float  | Base position from transcription start (default: 0*)                                                                            |
| 26 | relcDNApos      | float  | Relative position in transcript (default: 0)                                                                                    |
| 27 | CDSpos          | float  | Base position from coding start (default: 0*)                                                                                   |
| 28 | relCDSpos       | float  | Relative position in coding sequence (default: 0)                                                                               |
| 29 | protPos         | float  | Amino acid position from coding start (default: 0*)                                                                             |
| 30 | relProtPos      | float  | Relative position in protein codon (default: 0)                                                                                 |
| 31 | Domain          | factor | Domain annotation inferred from VEP annotation (ncoils, sigp, lcompl, hmmpanther, ndomain = "other named domain") (default: UD) |
| 32 | Dst2Splice      | float  | Distance to splice site in 20bp; positive: exonic, negative: intronic (default: 0)                                              |
| 33 | Dst2SplType     | factor | Closest splice site is ACCEPTOR or DONOR (default: unknown)                                                                     |
| 34 | minDistTSS      | float  | Distance to closest Transcribed Sequence Start (TSS) (default: 5.5)                                                             |
| 35 | minDistTSE      | float  | Distance to closest Transcribed Sequence End (TSE) (default: 5.5)                                                               |
| 36 | SIFTcat         | factor | SIFT category of change (default: UD)                                                                                           |
| 37 | SIFTval         | float  | SIFT score (default: 0*)                                                                                                        |
| 38 | PolyPhenCat     | factor | PolyPhen category of change (default: UD)                                                                                       |

|    |              |       |                                                                         |
|----|--------------|-------|-------------------------------------------------------------------------|
| 39 | PolyPhenVal  | float | PolyPhen score (default: 0*)                                            |
| 40 | priPhCons    | float | Primate PhastCons conservation score (excl. human) (default: 0.0)       |
| 41 | mamPhCons    | float | Mammalian PhastCons conservation score (excl. human) (default: 0.0)     |
| 42 | verPhCons    | float | Vertebrate PhastCons conservation score (excl. human) (default: 0.0)    |
| 43 | priPhyloP    | float | Primate PhyloP score (excl. human) (default: -0.029)                    |
| 44 | mamPhyloP    | float | Mammalian PhyloP score (excl. human) (default: -0.005)                  |
| 45 | verPhyloP    | float | Vertebrate PhyloP score (excl. human) (default: 0.042)                  |
| 46 | bStatistic   | int   | Background selection score (default: 800)                               |
| 47 | targetScan   | int   | targetscan (default: 0*)                                                |
| 48 | mirSVR-Score | float | mirSVR-Score (default: 0*)                                              |
| 49 | mirSVR-E     | float | mirSVR-E (default: 0)                                                   |
| 50 | mirSVR-Aln   | int   | mirSVR-Aln (default: 0)                                                 |
| 51 | cHmm_E1      | float | Number of 48 cell types in chromHMM state E1_poised (default: 1.92*)    |
| 52 | cHmm_E2      | float | Number of 48 cell types in chromHMM state E2_repressed (default: 1.92)  |
| 53 | cHmm_E3      | float | Number of 48 cell types in chromHMM state E3_dead (default: 1.92)       |
| 54 | cHmm_E4      | float | Number of 48 cell types in chromHMM state E4_dead (default: 1.92)       |
| 55 | cHmm_E5      | float | Number of 48 cell types in chromHMM state E5_repressed (default: 1.92)  |
| 56 | cHmm_E6      | float | Number of 48 cell types in chromHMM state E6_repressed (default: 1.92)  |
| 57 | cHmm_E7      | float | Number of 48 cell types in chromHMM state E7_weak (default: 1.92)       |
| 58 | cHmm_E8      | float | Number of 48 cell types in chromHMM state E8_gene (default: 1.92)       |
| 59 | cHmm_E9      | float | Number of 48 cell types in chromHMM state E9_gene (default: 1.92)       |
| 60 | cHmm_E10     | float | Number of 48 cell types in chromHMM state E10_gene (default: 1.92)      |
| 61 | cHmm_E11     | float | Number of 48 cell types in chromHMM state E11_gene (default: 1.92)      |
| 62 | cHmm_E12     | float | Number of 48 cell types in chromHMM state E12_distal (default: 1.92)    |
| 63 | cHmm_E13     | float | Number of 48 cell types in chromHMM state E13_distal (default: 1.92)    |
| 64 | cHmm_E14     | float | Number of 48 cell types in chromHMM state E14_distal (default: 1.92)    |
| 65 | cHmm_E15     | float | Number of 48 cell types in chromHMM state E15_weak (default: 1.92)      |
| 66 | cHmm_E16     | float | Number of 48 cell types in chromHMM state E16_tss (default: 1.92)       |
| 67 | cHmm_E17     | float | Number of 48 cell types in chromHMM state E17_proximal (default: 1.92)  |
| 68 | cHmm_E18     | float | Number of 48 cell types in chromHMM state E18_proximal (default: 1.92)  |
| 69 | cHmm_E19     | float | Number of 48 cell types in chromHMM state E19_tss (default: 1.92)       |
| 70 | cHmm_E20     | float | Number of 48 cell types in chromHMM state E20_poised (default: 1.92)    |
| 71 | cHmm_E21     | float | Number of 48 cell types in chromHMM state E21_dead (default: 1.92)      |
| 72 | cHmm_E22     | float | Number of 48 cell types in chromHMM state E22_repressed (default: 1.92) |
| 73 | cHmm_E23     | float | Number of 48 cell types in chromHMM state E23_weak (default: 1.92)      |
| 74 | cHmm_E24     | float | Number of 48 cell types in chromHMM state E24_distal (default: 1.92)    |
| 75 | cHmm_E25     | float | Number of 48 cell types in chromHMM state E25_distal (default: 1.92)    |
| 76 | GerpRS       | float | Gerp element score (default: 0)                                         |
| 77 | GerpRSpval   | float | Gerp element p-Value (default: 0)                                       |
| 78 | GerpN        | float | Neutral evolution score defined by GERP++ (default: 3.0)                |
| 79 | GerpS        | float | Rejected Substitution score defined by GERP++ (default: -0.2)           |



|     |                     |       |                                                                                                                        |
|-----|---------------------|-------|------------------------------------------------------------------------------------------------------------------------|
| 80  | tOverlapMotifs      | float | Number of overlapping predicted TF motifs                                                                              |
| 81  | motifDist           | float | Reference minus alternate allele difference in nucleotide frequency within an predicted overlapping motif (default: 0) |
| 82  | EncodeH3K4me1-sum   | float | Sum of Encode H3K4me1 levels (from 13 cell lines) (default: 0.76)                                                      |
| 83  | EncodeH3K4me1-max   | float | Maximum Encode H3K4me1 level (from 13 cell lines) (default: 0.37)                                                      |
| 84  | EncodeH3K4me2-sum   | float | Sum of Encode H3K4me2 levels (from 14 cell lines) (default: 0.73)                                                      |
| 85  | EncodeH3K4me2-max   | float | Maximum Encode H3K4me2 level (from 14 cell lines) (default: 0.37)                                                      |
| 86  | EncodeH3K4me3-sum   | float | Sum of Encode H3K4me3 levels (from 14 cell lines) (default: 0.81)                                                      |
| 87  | EncodeH3K4me3-max   | float | Maximum Encode H3K4me3 level (from 14 cell lines) (default: 0.38)                                                      |
| 88  | EncodeH3K9ac-sum    | float | Sum of Encode H3K9ac levels (from 13 cell lines) (default: 0.82)                                                       |
| 89  | EncodeH3K9ac-max    | float | Maximum Encode H3K9ac level (from 13 cell lines) (default: 0.41)                                                       |
| 90  | EncodeH3K9me3-sum   | float | Sum of Encode H3K9me3 levels (from 14 cell lines) (default: 0.81)                                                      |
| 91  | EncodeH3K9me3-max   | float | Maximum Encode H3K9me3 level (from 14 cell lines) (default: 0.38)                                                      |
| 92  | EncodeH3K27ac-sum   | float | Sum of Encode H3K27ac levels (from 14 cell lines) (default: 0.74)                                                      |
| 93  | EncodeH3K27ac-max   | float | Maximum Encode H3K27ac level (from 14 cell lines) (default: 0.36)                                                      |
| 94  | EncodeH3K27me3-sum  | float | Sum of Encode H3K27me3 levels (from 14 cell lines) (default: 0.93)                                                     |
| 95  | EncodeH3K27me3-max  | float | Maximum Encode H3K27me3 level (from 14 cell lines) (default: 0.47)                                                     |
| 96  | EncodeH3K36me3-sum  | float | Sum of Encode H3K36me3 levels (from 10 cell lines) (default: 0.71)                                                     |
| 97  | EncodeH3K36me3-max  | float | Maximum Encode H3K36me3 level (from 10 cell lines) (default: 0.39)                                                     |
| 98  | EncodeH3K79me2-sum  | float | Sum of Encode H3K79me2 levels (from 13 cell lines) (default: 0.64)                                                     |
| 99  | EncodeH3K79me2-max  | float | Maximum Encode H3K79me2 level (from 13 cell lines) (default: 0.34)                                                     |
| 100 | EncodeH4K20me1-sum  | float | Sum of Encode H4K20me1 levels (from 11 cell lines) (default: 0.88)                                                     |
| 101 | EncodeH4K20me1-max  | float | Maximum Encode H4K20me1 level (from 11 cell lines) (default: 0.47)                                                     |
| 102 | EncodeH2AFZ-sum     | float | Sum of Encode H2AFZ levels (from 13 cell lines) (default: 0.9)                                                         |
| 103 | EncodeH2AFZ-max     | float | Maximum Encode H2AFZ level (from 13 cell lines) (default: 0.42)                                                        |
| 104 | EncodeDNase-sum     | float | Sum of Encode DNase-seq levels (from 12 cell lines) (default: 0.0)                                                     |
| 105 | EncodeDNase-max     | float | Maximum Encode DNase-seq level (from 12 cell lines) (default: 0.0)                                                     |
| 106 | EncodetotalRNA-sum  | float | Sum of Encode totalRNA-seq levels (from 10 cell lines always minus and plus strand) (default: 0.0)                     |
| 107 | EncodetotalRNA-max  | float | Maximum Encode totalRNA-seq level (from 10 cell lines, minus and plus strand separately) (default: 0.0)                |
| 108 | Grantham            | float | Grantham score: oAA,nAA (default: 0*)                                                                                  |
| 109 | SpliceAI-acc-gain   | float | Masked SpliceAI acceptor gain score (default: 0*)                                                                      |
| 110 | SpliceAI-acc-loss   | float | Masked SpliceAI acceptor loss score (default: 0)                                                                       |
| 111 | SpliceAI-don-gain   | float | Masked SpliceAI donor gain score (default: 0)                                                                          |
| 112 | SpliceAI-don-loss   | float | Masked SpliceAI donor loss score (default: 0)                                                                          |
| 113 | MMSp_acceptorIntron | float | MMSplice acceptor intron (intron 3') score (default: 0)                                                                |
| 114 | MMSp_acceptor       | float | MMSplice acceptor score (default: 0)                                                                                   |
| 115 | MMSp_exon           | float | MMSplice exon score (default: 0)                                                                                       |
| 116 | MMSp_donor          | float | MMSplice donor score (default: 0)                                                                                      |
| 117 | MMSp_donorIntron    | float | MMSplice donor intron (intron 5') score (default: 0)                                                                   |
| 118 | Dist2Mutation       | float | Distance between the closest BRAVO SNV up and downstream (position itself excluded) (default: 0*)                      |
| 119 | Freq100bp           | int   | Number of frequent (MAF > 0.05) BRAVO SNV in 100 bp window nearby (default: 0)                                         |
| 120 | Rare100bp           | int   | Number of rare (MAF < 0.05) BRAVO SNV in 100 bp window nearby (default: 0)                                             |

|     |                            |        |                                                                                                 |
|-----|----------------------------|--------|-------------------------------------------------------------------------------------------------|
| 121 | Sngl100bp                  | int    | Number of single occurrence BRAVO SNV in 100 bp window nearby (default: 0)                      |
| 122 | Freq1000bp                 | int    | Number of frequent (MAF > 0.05) BRAVO SNV in 1000 bp window nearby (default: 0)                 |
| 123 | Rare1000bp                 | int    | Number of rare (MAF < 0.05) BRAVO SNV in 1000 bp window nearby (default: 0)                     |
| 124 | Sngl1000bp                 | int    | Number of single occurrence BRAVO SNV in 1000 bp window nearby (default: 0)                     |
| 125 | Freq10000bp                | int    | Number of frequent (MAF > 0.05) BRAVO SNV in 10000 bp window nearby (default: 0)                |
| 126 | Rare10000bp                | int    | Number of rare (MAF < 0.05) BRAVO SNV in 10000 bp window nearby (default: 0)                    |
| 127 | Sngl10000bp                | int    | Number of single occurrence BRAVO SNV in 10000 bp window nearby (default: 0)                    |
| 128 | EnsembleRegulatory-Feature | factor | Matches in the Ensemble Regulatory Built (similar to annotype) (default: NA)                    |
| 129 | dbscSNV-ada_score          | float  | Adaboost classifier score from dbscSNV (default: 0*)                                            |
| 130 | dbscSNV-rf_score           | float  | Random forest classifier score from dbscSNV (default: 0*)                                       |
| 131 | RemapOverlapTF             | int    | Remap number of different transcription factors binding (default: -0.5)                         |
| 132 | RemapOverlapCL             | int    | Remap number of different transcription factor - cell line combinations binding (default: -0.5) |
| 133 | (RawScore)                 | float  | Raw score from the model                                                                        |
| 134 | (PHRED)                    | float  | CADD PHRED Score                                                                                |

\* A Boolean indicator variable was created in order to handle undefined values. Note that often indicators represent more than one annotation. They are created for only (the first) one if the covered genomic regions are identical.

**Table S3: Data set used in CADD-Splice development.** Developing CADD-Splice, we used various data sets, many of which are the default for training and evaluating CADD models as previously described [1, 2]. The MFASS data [3] was primarily used to identify splice predictors and to reevaluate performance of CADD models.

| Data set                                | Source                                                                                                                                                                                            | Used for                                                                  |
|-----------------------------------------|---------------------------------------------------------------------------------------------------------------------------------------------------------------------------------------------------|---------------------------------------------------------------------------|
| MFASS                                   | <a href="https://krishna.gs.washington.edu/download/CADD-development/v1.6/validation/MFASS/">https://krishna.gs.washington.edu/download/CADD-development/v1.6/validation/MFASS/</a> , [3]         | feature exploration, AUC comparisons                                      |
| Human derived                           | <a href="https://krishna.gs.washington.edu/download/CADD-development/v1.6/training_data/GRCh37/">https://krishna.gs.washington.edu/download/CADD-development/v1.6/training_data/GRCh37/</a> , [1] | feature selection, positive <sup>†</sup> CADD training labels             |
| Simulated variants                      | <a href="https://krishna.gs.washington.edu/download/CADD-development/v1.6/training_data/GRCh37/">https://krishna.gs.washington.edu/download/CADD-development/v1.6/training_data/GRCh37/</a> , [1] | feature selection, negative <sup>†</sup> CADD training labels             |
| ClinVar - pathogenic                    | <a href="https://krishna.gs.washington.edu/download/CADD-development/v1.6/validation/clinVar/">https://krishna.gs.washington.edu/download/CADD-development/v1.6/validation/clinVar/</a> , [4]     | negative <sup>†</sup> set in AUC comparisons, model validation and test * |
| ClinVar - likely pathogenic             | <a href="https://krishna.gs.washington.edu/download/CADD-development/v1.6/validation/clinVar/">https://krishna.gs.washington.edu/download/CADD-development/v1.6/validation/clinVar/</a> , [4]     | negative <sup>†</sup> set in AUC comparisons, model test                  |
| gnomAD exome , MAF > 0.05               | <a href="https://krishna.gs.washington.edu/download/CADD-development/v1.6/validation/gnomad/">https://krishna.gs.washington.edu/download/CADD-development/v1.6/validation/gnomad/</a> , [5]       | positive <sup>†</sup> set in AUC comparisons, model validation and test * |
| gnomAD exome, MAF < 0.05                | <a href="https://krishna.gs.washington.edu/download/CADD-development/v1.6/validation/gnomad/">https://krishna.gs.washington.edu/download/CADD-development/v1.6/validation/gnomad/</a> , [5]       | positive <sup>†</sup> set in AUC comparisons, model test                  |
| DMS data set of BRCA1, YAP1, DLG4, TPMT | <a href="https://krishna.gs.washington.edu/download/CADD-development/v1.6/validation/DMS/">https://krishna.gs.washington.edu/download/CADD-development/v1.6/validation/DMS/</a> , [6]             | Score correlation, model validation                                       |
| Enhancer & promoter MPRA                | <a href="https://krishna.gs.washington.edu/download/CADD-development/v1.6/validation/MPRA/">https://krishna.gs.washington.edu/download/CADD-development/v1.6/validation/MPRA/</a> , [7–9]         | Score correlation, model validation                                       |
| TP53 frequencies                        | <a href="https://krishna.gs.washington.edu/download/CADD-development/v1.6/validation/tp53/">https://krishna.gs.washington.edu/download/CADD-development/v1.6/validation/tp53/</a> , [10]          | Score correlation, model validation                                       |
| HBB severity classes                    | <a href="https://krishna.gs.washington.edu/download/CADD-">https://krishna.gs.washington.edu/download/CADD-</a>                                                                                   | Class-wise score separation (Kruskal-Wallis test), model validation       |

|  |                                                            |  |
|--|------------------------------------------------------------|--|
|  | <a href="#">development/v1.6/validation/HBB/</a> ,<br>[11] |  |
|--|------------------------------------------------------------|--|

† negative corresponds to suspected pathogenic variants while positive corresponds to suspected neutral

\* chromosome hold-out split between validation and test

## References

1. Kircher M, Witten DM, Jain P, et al (2014) A general framework for estimating the relative pathogenicity of human genetic variants. *Nat Genet* 46:310–315. <https://doi.org/10.1038/ng.2892>
2. Rentzsch P, Witten D, Cooper GM, et al (2019) CADD: predicting the deleteriousness of variants throughout the human genome. *Nucleic Acids Res* 47:D886–D894. <https://doi.org/10.1093/nar/gky1016>
3. Cheung R, Insigne KD, Yao D, et al (2019) A Multiplexed Assay for Exon Recognition Reveals that an Unappreciated Fraction of Rare Genetic Variants Cause Large-Effect Splicing Disruptions. *Mol Cell* 73:183–194. <https://doi.org/10.1016/j.molcel.2018.10.037>
4. Landrum MJ, Lee JM, Benson M, et al (2018) ClinVar: improving access to variant interpretations and supporting evidence. *Nucleic Acids Res* 46:D1062–D1067. <https://doi.org/10.1093/nar/gkx1153>
5. Karczewski KJ, Francioli LC, Tiao G, et al (2020) The mutational constraint spectrum quantified from variation in 141,456 humans. *Nature* 581:434–443. <https://doi.org/10.1038/s41586-020-2308-7>
6. Gray VE, Hause RJ, Luebeck J, et al (2018) Quantitative Missense Variant Effect Prediction Using Large-Scale Mutagenesis Data. *Cell Syst* 6:116–124.e3. <https://doi.org/10.1016/j.cels.2017.11.003>
7. Patwardhan RP, Lee C, Litvin O, et al (2009) High-resolution analysis of DNA regulatory elements by synthetic saturation mutagenesis. *Nat Biotechnol* 27:1173–1175. <https://doi.org/10.1038/nbt.1589>
8. Patwardhan RP, Hiatt JB, Witten DM, et al (2012) Massively parallel functional dissection of mammalian enhancers *in vivo*. *Nat Biotechnol* 30:265–270. <https://doi.org/10.1038/nbt.2136>
9. Kircher M, Xiong C, Martin B, et al (2019) Saturation mutagenesis of twenty disease-associated regulatory elements at single base-pair resolution. *Nat Commun* 10:3583. <https://doi.org/10.1038/s41467-019-11526-w>
10. Bouaoun L, Sonkin D, Ardin M, et al (2016) TP53 Variations in Human Cancers: New Lessons from the IARC TP53 Database and Genomics Data. *Hum Mutat* 37:865–876. <https://doi.org/10.1002/humu.23035>
11. Giardine B, Baal S van, Kaimakis P, et al (2007) HbVar database of human hemoglobin variants and thalassemia mutations: 2007 update. *Hum Mutat* 28:206–206. <https://doi.org/10.1002/humu.9479>
